# Supplementary material
Source: PubMed Central journal article supplement (PMC3021242)
Supplement: NIHMS257275-supplement-1_si_001.pdf [file NIHMS257275-supplement-1_si_001.pdf]

## Supporting Information File:

### Nanopore Detection of 8-Oxo-7,8-dihydro-2'-deoxyguanosine in Immobilized Single-stranded DNA via Adduct Formation to the DNA Damage Site

Anna E. P. Schibel, Na An, Qian Jin, Aaron M. Fleming, Cynthia J. Burrows\*, and Henry S. White\*

Department of Chemistry, University of Utah, 315 S. 1400 East, Salt Lake City, UT 84112-0850

## Complete Reference 10

Branton, D.; Deamer, D. W.; Marziali, A.; Bayley, H.; Benner, S. A.; Butler, T.; Di Ventra, M.; Garaj, S.; Hibbs, A.; Huang, X.; Jovanovich, S. B.; Krstic, P. S.; Lindsay, S.; Ling, X. S.; Mastrangelo, C. H.; Meller, A.; Oliver, J. S.; Pershin, Y. V.; Ramsey, J. M.; Riehn, R.; Soni, G. V.; Tabard-Cossa, V.; Wanunu, M.; Wiggin, M.; Schloss, J. A. *Nat. Biotech.* **2008**, *26*, 1146-1153.

## Experimental Procedures

*Reagents for Adduct Synthesis.* Gly-Pro-Arg-Pro amide, spermine, spermidine, benzylamine, D-(+)-glucosamine, *N*<sup>ϵ</sup>-acetyllysine methyl ester hydrochloride, and Na<sub>2</sub>IrCl<sub>6</sub>, were purchased from commercial suppliers and used without further purification.

*DNA preparation and purification procedures.* The 3'-biotinylated oligodeoxynucleotides (ODN) were synthesized from commercially available phosphoramidites (Glen Research, Sterling, VA) by the DNA-Peptide Core Facility at the University of Utah. After synthesis, each ODN was cleaved from the synthetic column and deprotected according to the manufacturer's protocols,

followed by purification using a semi-preparation ion-exchange HPLC column with a linear gradient of 25% to 100% B over 30 min while monitoring absorbance at 260 nm (A = 20 mM Tris, 1 M NaCl pH 7 in 10% CH<sub>3</sub>CN/90% ddH<sub>2</sub>O, B = 10% CH<sub>3</sub>CN/90% ddH<sub>2</sub>O, flow rate = 3 mL/min). The identities and purities of the ODNs were determined by negative ion electron spray (ESI) on a Micromass Quattro II mass spectrometer equipped with Zspray API source in the mass spectrometry laboratory at the Department of Chemistry, University of Utah.

*Synthesis of ODN-hydantoin/ODN-Sp-NR products.* The ODN-hydantoin/ODN-Sp-NR products were synthesized using the methodology previously established by the Burrows laboratory.<sup>1,2,3</sup> Briefly, the **ODN-Gh** products were produced by incubating OG-containing oligomers (10 μM, 1 nmole) in ddH<sub>2</sub>O at 4 °C for 30 min; 12 equivalents of Na<sub>2</sub>IrCl<sub>6</sub> (120 μM, 12 nmoles) were titrated into the ODN samples. After a 30 min incubation, the reactions were terminated with Na<sub>2</sub>EDTA (pH 8, 1 mM, 100 nmoles). The **ODN-Sp** products were synthesized by allowing the OG-containing oligomers (10 μM, 1 nmole) in 75 mM NaP<sub>i</sub> buffer (pH 7.4) to incubate at 45 °C for 30 min, followed by addition of 12 equivalents of Na<sub>2</sub>IrCl<sub>6</sub> (120 μM, 12 nmoles), and Na<sub>2</sub>EDTA (pH 8, 1 mM, 100 nmoles) was used to quench the oxidant after the reactions proceeded for 30 min.

The syntheses of **ODN-Sp-NRs** were achieved by thermally equilibrating the OG-containing oligomers (10 μM, 1 nmole) and various amines (2 mM, 200 nmoles) in 75 mM NaP<sub>i</sub> buffer (pH 8.0) at 45 °C for 30 min; then 15 equivalents of Na<sub>2</sub>IrCl<sub>6</sub> (150 μM, 15 nmoles) were titrated into the samples that were then left for 30 min. The reactions were quenched the same way as previously described.

All the products were purified by an analytical ion-exchange HPLC column with a linear gradient of 25% to 100% B over 30 min while monitoring absorbance at 260 nm (A = 20 mM Tris, 1 M NaCl pH 7 in 10% CH<sub>3</sub>CN/90% ddH<sub>2</sub>O, B = 10% CH<sub>3</sub>CN/90% ddH<sub>2</sub>O, flow rate = 1

mL/min); see Table SI 1. *ODN-Sp-spermine and ODN-Sp-spermidine products were used immediately due to their instability.*<sup>2</sup>

*Chemicals and Materials.* Aqueous solutions mentioned below were prepared using >18 M $\Omega$ -cm ultrapure water from a Barnstead E-pure water purifier. KCl (Sigma-Aldrich), trizma base (Sigma-Aldrich), EDTA (Mallinckrodt Chemicals), and HCl (EMD) were used as received. A buffered electrolyte solution of 1.0 M KCl, 25 mM Tris-HCl, and 1.0 mM EDTA (pH 7.9) was prepared and used for all ion channel recording measurements. The buffered electrolyte solution was filtered using a sterile 0.22 mm Millipore vacuum filter (Fisher Scientific). The wild type protein channel  $\alpha$ -hemolysin ( $\alpha$ HL), isolated from *Staphylococcus aureus* as a monomer, was obtained as a lyophilized powder from List Biological Laboratories and stored at concentration of 0.5 mg  $\alpha$ HL per mL ultra pure water in a -20 °C freezer. Upon use, the  $\alpha$ HL solution was diluted to a concentration of 0.05 mg  $\alpha$ HL per mL using the above mentioned buffered electrolyte and added directly to the experimental cell. The phospholipid 1,2-diphytanoyl-*sn*-glycero-3-phosphocholine (DPhPC) was purchased from Avanti Polar Lipids as a powder and stored in a -20 °C freezer. Upon use, the DPhPC powder was dispersed in decane (Fisher Scientific) to a concentration of 10 mg DPhPC per mL decane. Glass nanopore membranes (GNMs) were fabricated as previously described,<sup>4,5</sup> and before use as a bilayer support, were silanized in 2% (v:v) 3-cyanopropyldimethylchlorosilane in acetonitrile (Fisher Scientific) overnight.<sup>6</sup> Ag/AgCl electrodes were prepared by soaking silver wire (0.25 mm diameter, Alfa Aesar) in bleach. All DNA oligomers studied were obtained as described above, and DNA molecule binding to streptavidin was achieved by mixing DNA and streptavidin at a 4:1 ratio and incubating at room temperature for 10 minutes.

*Immobilization Ion Channel Recording Measurements.* Current-time (*i-t*) measurements were performed using a custom built high-impedance, low noise amplifier and data acquisition system (Electronic Bio Sciences, San Diego CA. Before use, a GNM was rinsed with ethanol and ultra

pure water, and finally filled with buffered electrolyte. The GNM was positioned within the EBS DC System via a pipette holder (Dagan Corporation), where the back end was sealed to a pressure gauge and 10 mL gas-tight syringe (Hamilton). An Ag/AgCl electrode wire was positioned inside the GNM and a second Ag/AgCl electrode was positioned in the experimental cell, external to the GNM. The same buffered electrolyte used to fill the GNM was added to the EBS DC System experimental cell,  $\alpha$ HL was also added to the experimental cell (external to the GNM). Voltage was applied across the GNM orifice, *cis* vs. *trans* with respect to the  $\alpha$ HL channel, and external vs. internal with respect to the GNM, and the resultant current was measured as a function of time.

Suspended bilayers were generated through painting. To form a suspended bilayer, a plastic pipette tip (gel-loading tips, flat, 1-200  $\mu$ L, 0.4 mm) was filled with lipid solution and gently pulled across the GNM face, over the orifice. The establishment of a bilayer was confirmed by observing a drop in conductance as voltage was applied across the GNM orifice; an open pore has a resistance of approximately 10 M $\Omega$ , while a bilayer suspended across a GNM exhibits a resistance of around 100 G $\Omega$ .<sup>6</sup> After bilayer formation, a pressure was applied to the back of the GNM for protein channel reconstitution to occur.<sup>6</sup> Strep-Btn DNA was added to the cell in 100-200 nM increments. DNA was captured and held using an applied voltage of -120 mV (*cis* vs. *trans*), and released by reversing the bias. The modified sample of interest was added to the experimental cell first, and after an adequate number of blockage events are collected, a second control sample, Strep-Btn C<sub>40</sub>, was added to the cell to provide a reference position. Data were collected with a 10 kHz low pass filter, and 50 kHz data acquisition rate.

*DNA Immobilization Data Analysis.* Only capture events longer than 1 second were included in data analysis. All event current blockage values (*I*) were normalized by the immediately preceding open channel current (*I*<sub>o</sub>), and expressed as %*I*/*I*<sub>o</sub>. The Strep-Btn C<sub>40</sub> %*I*/*I*<sub>o</sub> peak position was set as the reference position 0. %*I*/*I*<sub>o</sub> for all other molecules is reported relative to

Strep-Btn C<sub>40</sub>; more blocking %I<sub>0</sub> values are negative relative to Strep-Btn C<sub>40</sub> and less blocking %I<sub>0</sub> values are positive relative to Strep-Btn C<sub>40</sub>.

Table SI 1. Characterization of the oligonucleotides.

| Name                                   | HPLC retention time (min) | Mass     |                      |
|----------------------------------------|---------------------------|----------|----------------------|
|                                        |                           | Expected | Observed             |
| <b>C<sub>40</sub></b>                  | 14.5                      | 12075.2  | 12075.3              |
| <b>C<sub>39</sub>G<sub>14</sub></b>    | 14.4                      | 12115.3  | 12116.7              |
| <b>C<sub>39</sub>T<sub>14</sub></b>    | 14.4                      | 12090.3  | 12089.6              |
| <b>C<sub>39</sub>A<sub>14</sub></b>    | 14.4                      | 12099.3  | 12099.2              |
| <b>C<sub>39</sub>OG<sub>14</sub></b>   | 13.9                      | 12131.3  | 12131.2              |
| <b>C<sub>39</sub>Sp<sub>14</sub></b>   | 14.2/14.5                 | 12147.3  | 12163.2 <sup>a</sup> |
| <b>C<sub>39</sub>Gh<sub>14</sub></b>   | 13.7                      | 12121.3  | 12137.5 <sup>a</sup> |
| <b>C<sub>39</sub>Bz<sub>14</sub></b>   | 13.4                      | 12236.4  | 12236.8              |
| <b>C<sub>39</sub>GlcN<sub>14</sub></b> | 12.7                      | 12308.5  | 12308.8              |
| <b>C<sub>39</sub>Spd<sub>14</sub></b>  | 12.9                      | 12274.6  | 12276.8              |
| <b>C<sub>39</sub>Spm<sub>14</sub></b>  | 12.8                      | 12331.7  | NA                   |
| <b>C<sub>39</sub>Lys<sub>14</sub></b>  | 13.9/14.1                 | 12331.4  | 12348.0 <sup>a</sup> |
| <b>C<sub>39</sub>GPRP<sub>14</sub></b> | 11.3/11.9                 | 12553.8  | 12553.6              |
| <b>KrasG<sub>14</sub></b>              | 12.0                      | 12864.1  | 12864.8              |
| <b>KrasOG<sub>14</sub></b>             | 12.0                      | 12880.1  | 12880.0              |
| <b>KrasSp<sub>14</sub></b>             | 12.1/12.2                 | 12896.1  | 12895.2              |
| <b>KrasGh<sub>14</sub></b>             | 11.5/11.7                 | 12870.1  | 12885.9 <sup>a</sup> |
| <b>KrasSpm<sub>14</sub></b>            | 10.8                      | 13030.4  | NA                   |

NA: not available due to instability of the adduct.

a: Products showed oxidation of the biotin during synthesis.

Figure SI 1. Example  $i-t$  trace and  $\%I/I_0$  histogram for Strep-Btn  $C_{40}$ . Strep-Btn  $C_{40}$  current blockages result in a single, sharp, prominent  $\%I/I_0$  peak. Strep-Btn  $C_{40}$  consistently yielded a single, sharp  $\%I/I_0$  peak, and since all modifications discussed below are present within a  $C_{40}$  background, Strep-Btn  $C_{40}$  was used as a reference molecule.  $\%I/I_0$  histograms in the text and in the following figures for single-modified base substitutions are plotted relative to  $\%I/I_0$  for Strep-Btn  $C_{40}$  peak position, which is assigned a value of 0.

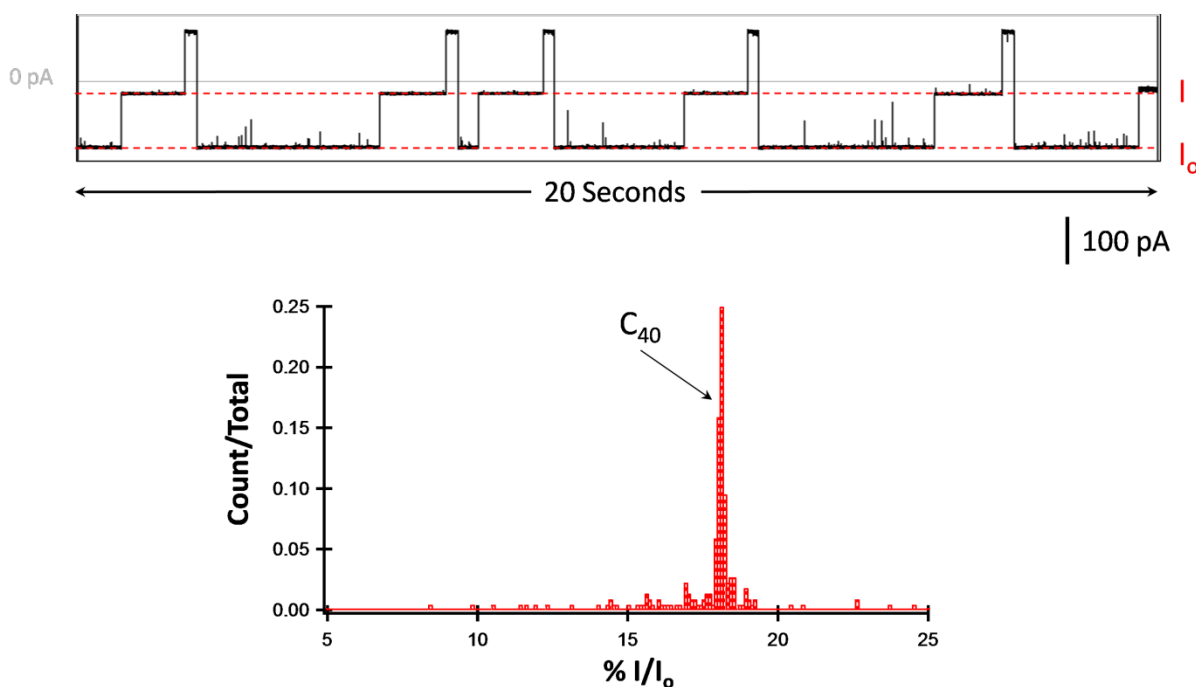

Figure SI 2. Example  $i-t$  trace for Strep-Btn  $C_{39}G_{014}$  and  $\%I/I_0$  histogram compared with Strep-Btn  $C_{40}$ .

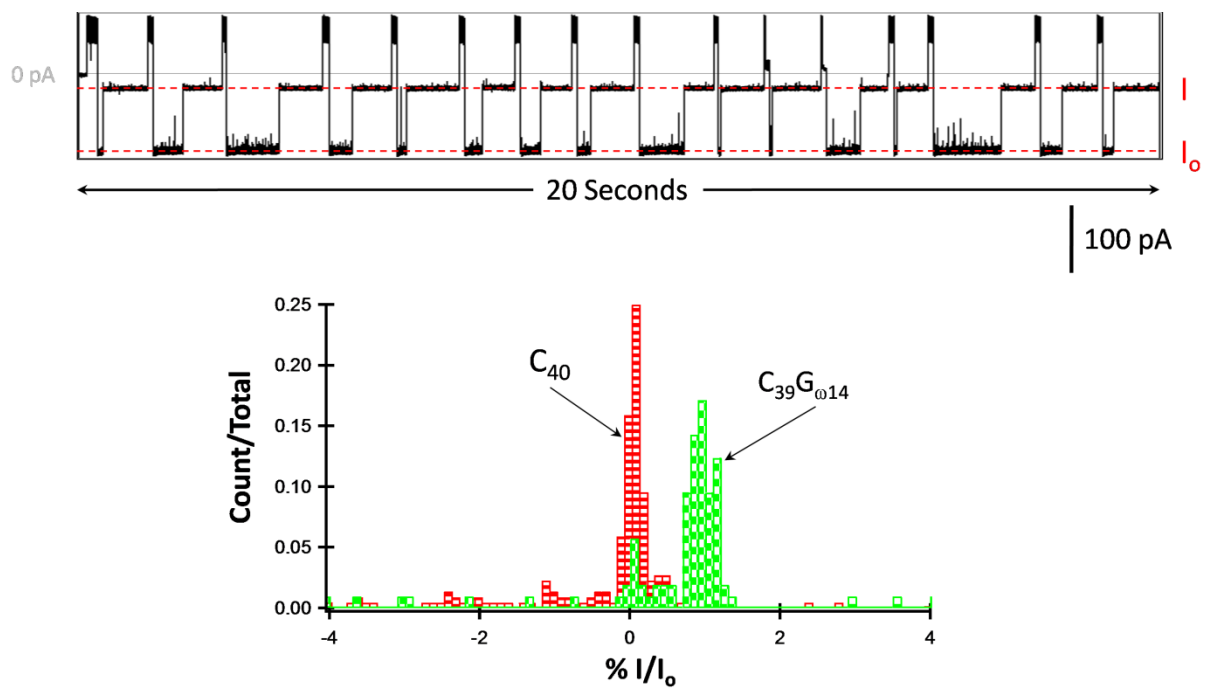



Figure SI 3. Example  $i$ - $t$  trace for Strep-Btn  $C_{39}OG_{014}$  and  $\%I/I_0$  histogram compared with Strep-Btn  $C_{40}$ .

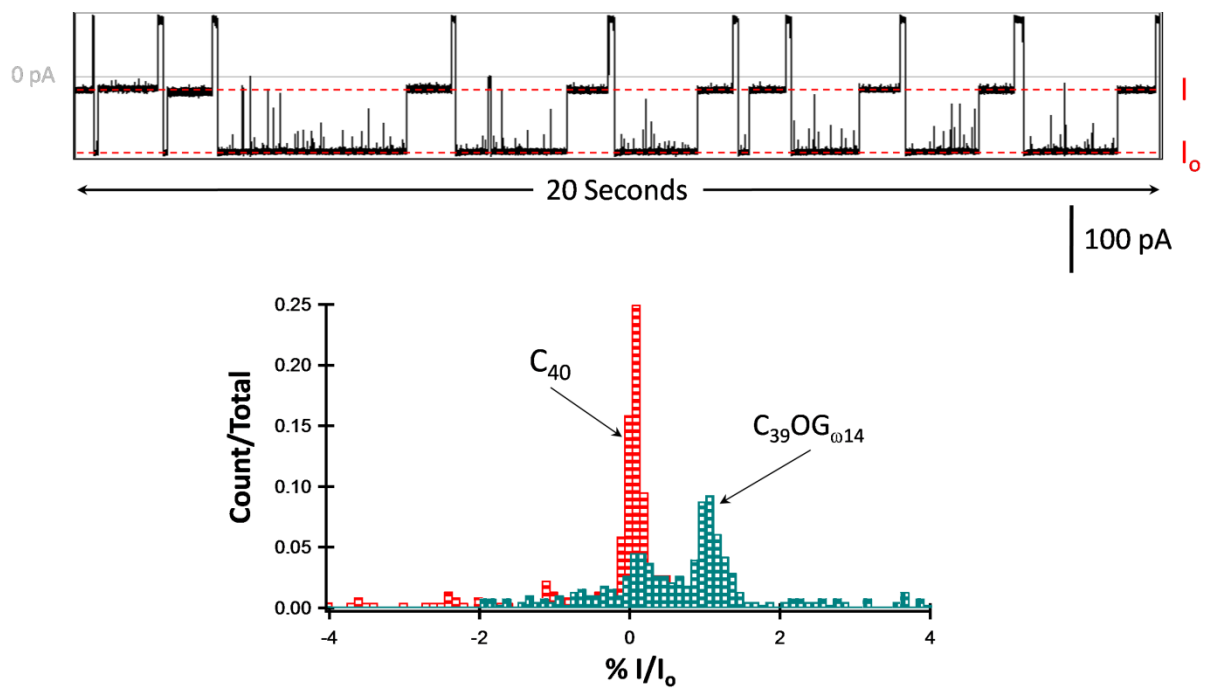

Figure SI 4. Example  $i$ - $t$  traces for Strep-Btn  $C_{39}Sp_{014}$  (upper) and Strep-Btn  $C_{39}Gh_{014}$  (lower), and their respective  $\%I/I_0$  histograms compared with Strep-Btn  $C_{40}$ .

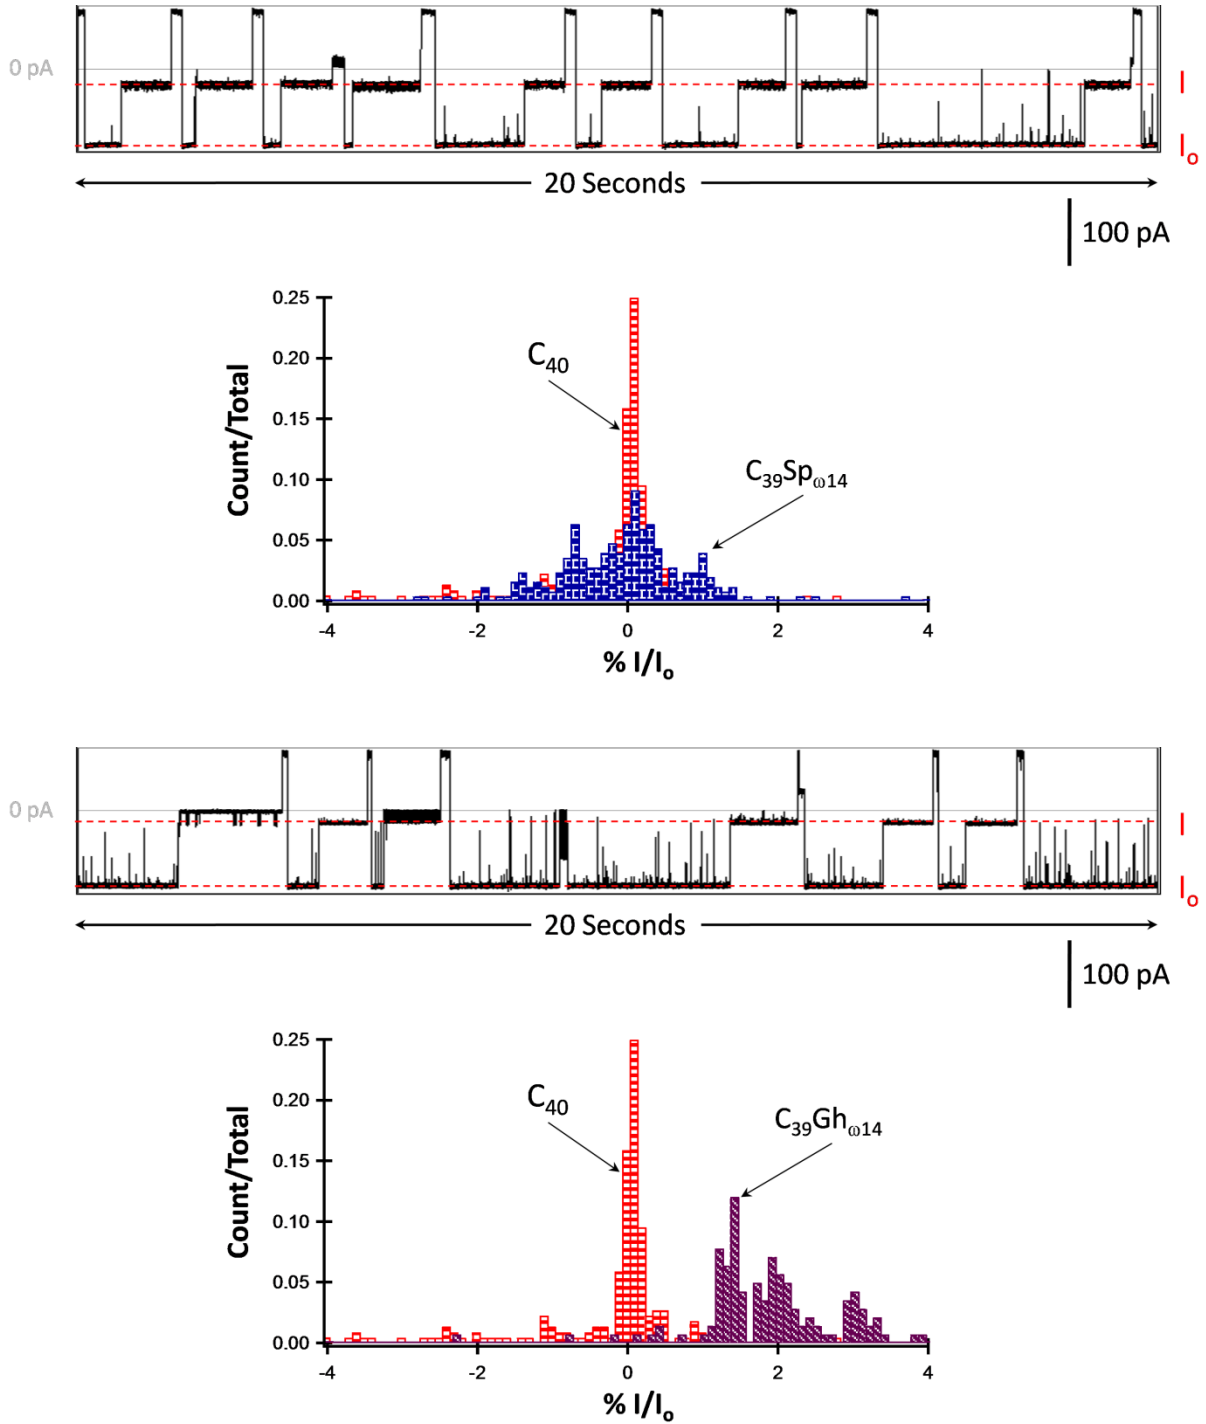

Figure SI 5. Example  $i-t$  trace for Strep-Btn  $C_{39}Lys_{0.14}$  and the resulting  $\%I/I_0$  histogram compared with Strep-Btn  $C_{40}$ . The lysine adduct produced multiple current blockage levels and noise amplitudes.

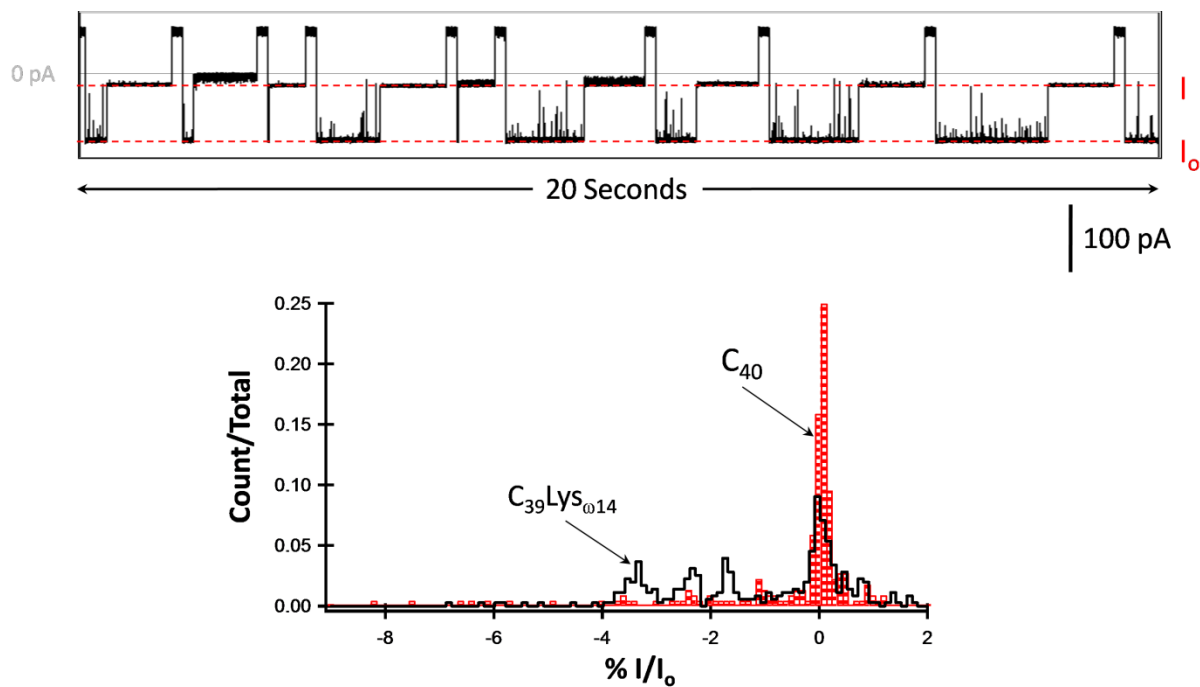

Figure SI 6. Example *i-t* traces for Strep-Btn  $C_{39}Bz_{014}$  (upper) and Strep-Btn  $C_{39}GlcN_{014}$  (lower) and the resulting  $\%I/I_0$  histograms compared with Strep-Btn  $C_{40}$ . Both adducts produced multiple current blockage levels and noise amplitudes. Although the glucosamine adduct is a six-membered ring similar to the benzylamine adduct, it contains hydroxyl groups and is not aromatic.

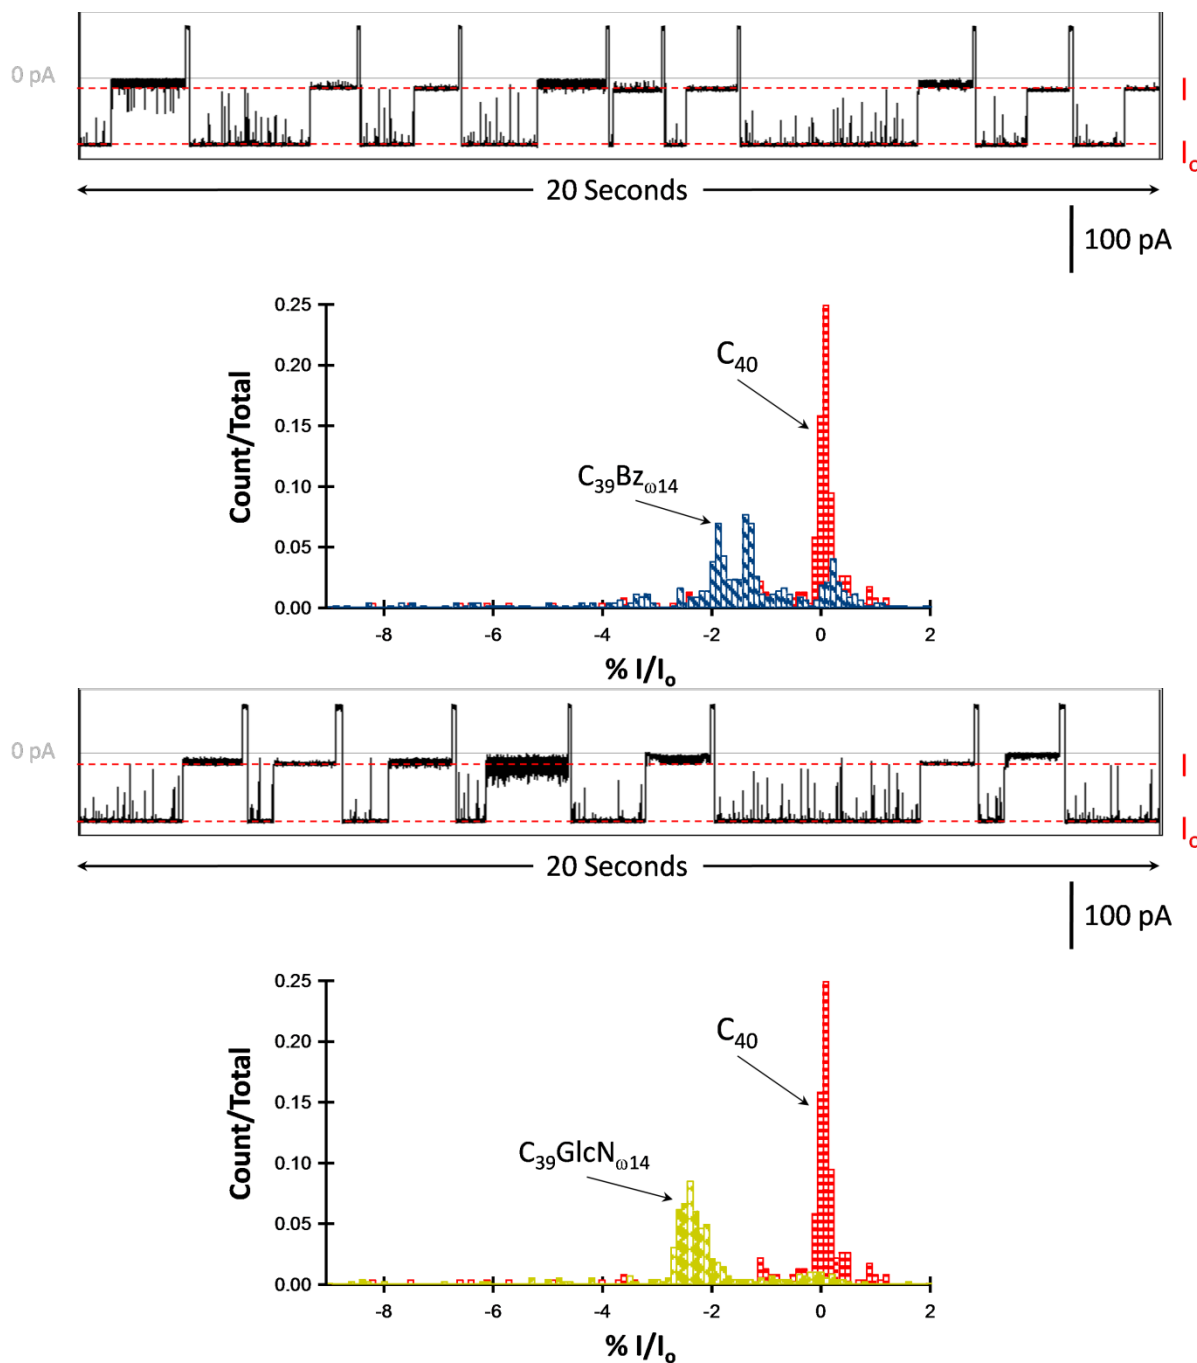

Figure SI 7. Example  $i-t$  traces for Strep-Btn  $C_{39}Spd_{\omega 14}$  (upper) and Strep-Btn  $C_{39}Spm_{\omega 14}$  (lower) and the resulting  $\%I/I_0$  histograms compared with Strep-Btn  $C_{40}$ . Both adducts are linear and contain amine groups, with spermine being the longer of the two.  $\%I/I_0$  histograms for both show multiple peak levels, but similar levels of noise. Both displayed less variable current blockage and noise levels relative to the cyclic adducts (Trp, Bz, and GlcN).

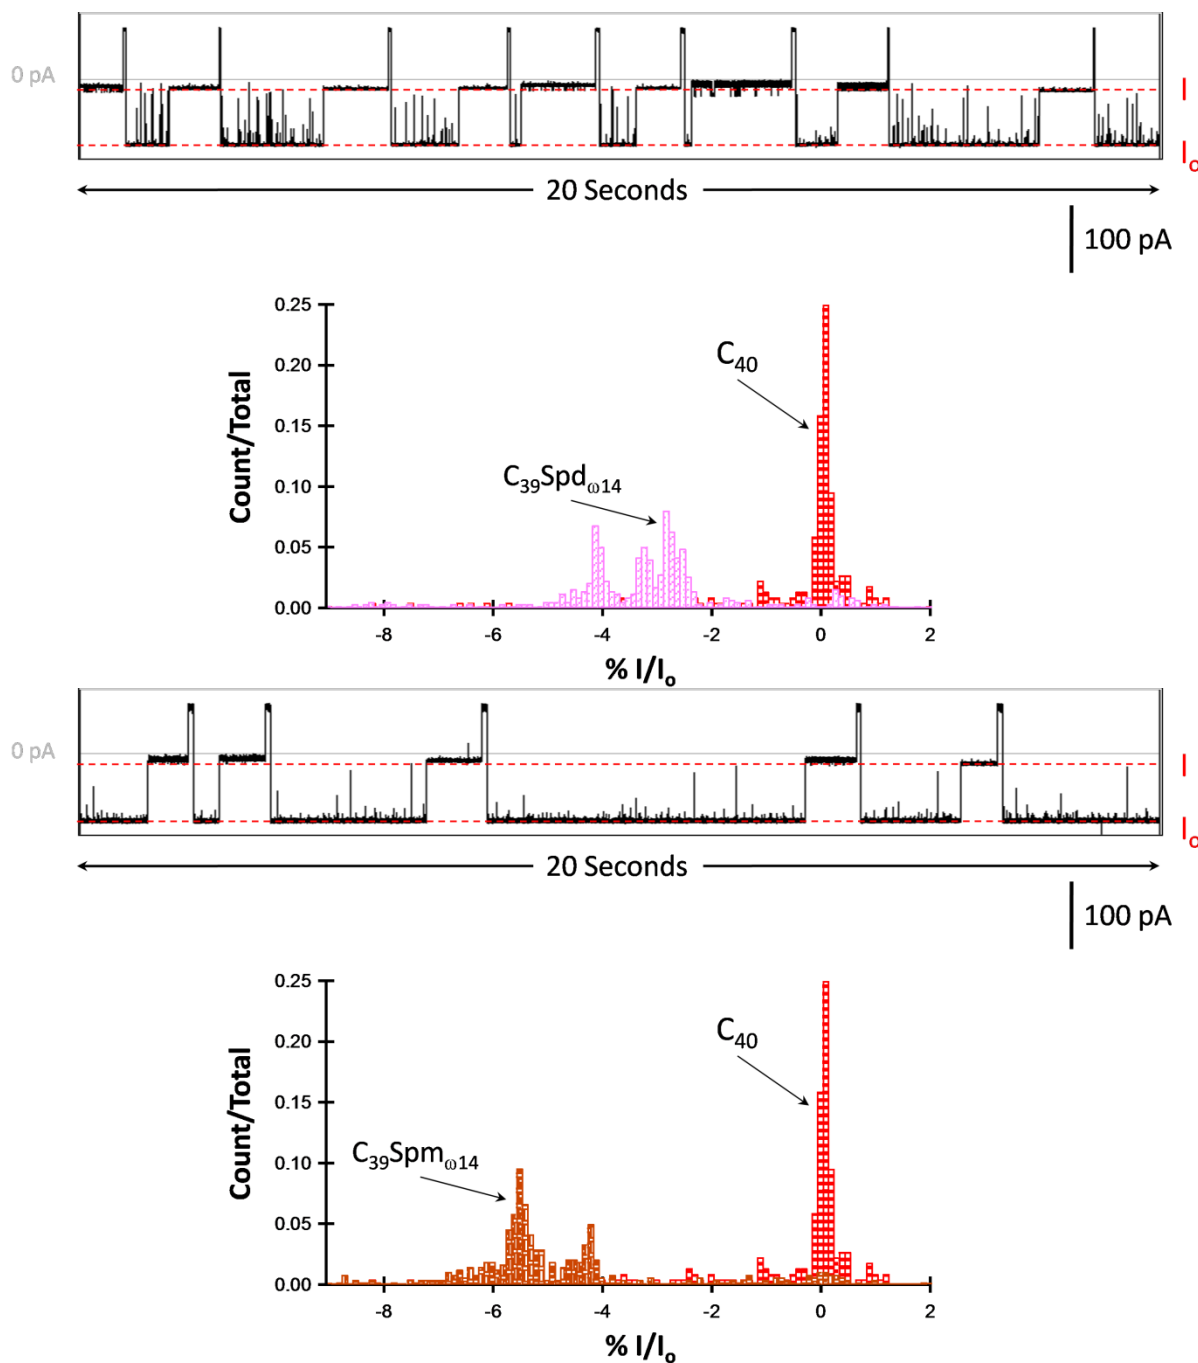

Figure SI 8. Example  $i-t$  trace for Strep-Btn  $C_{39}GPRP_{\omega 14}$  and  $\%I/I_0$  histogram compared with Strep-Btn  $C_{40}$ . The glycine-proline-arginine-proline amide adduct produced the deepest current blockages events relative to other adducts in this study. There was a large spread in current blockage levels as well as noise amplitude, and a relatively strong peak  $\%I/I_0 = 0$ . The presence of this peak may indicate that the molecule is too large to enter the sensing region of the  $\alpha$ HL channel and the surrounding poly-dC sequence is being occasionally detected.

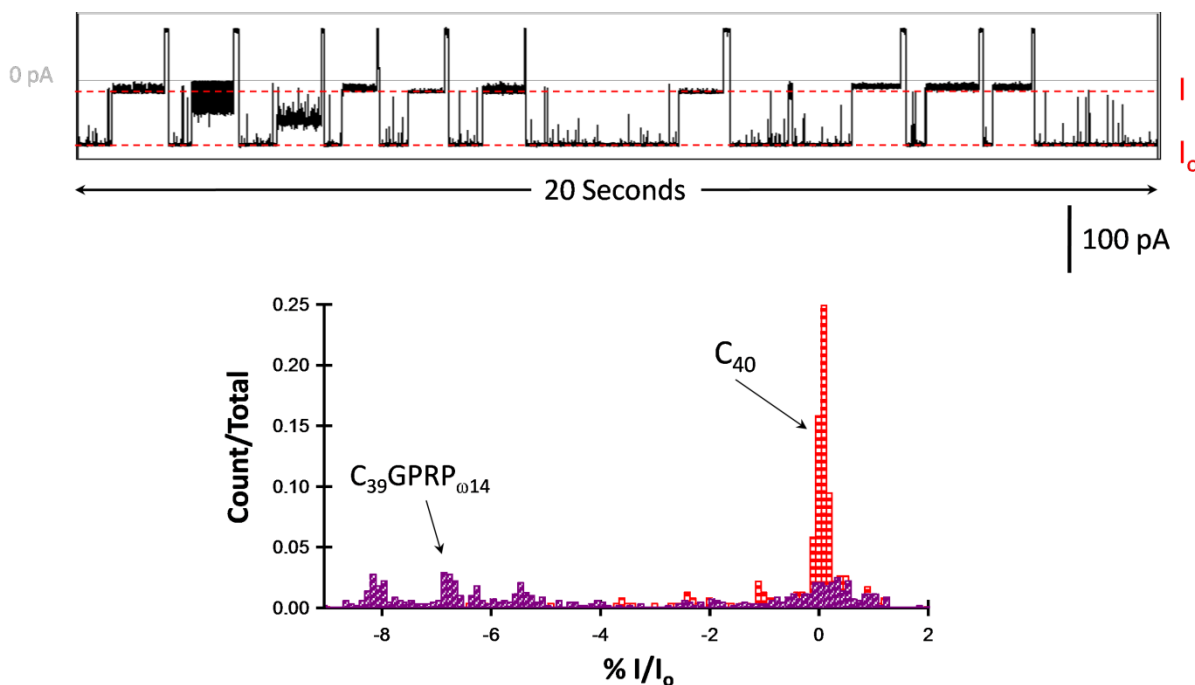

Figure SI 9. Example  $i-t$  trace for Strep-Btn Kras-G<sub>14</sub> and the resulting  $\%I/I_0$  histogram compared with Strep-Btn C<sub>40</sub>. Strep-Btn Kras-G<sub>14</sub> produces current blockage levels similar to Strep-Btn C<sub>40</sub>, but with a larger spread.

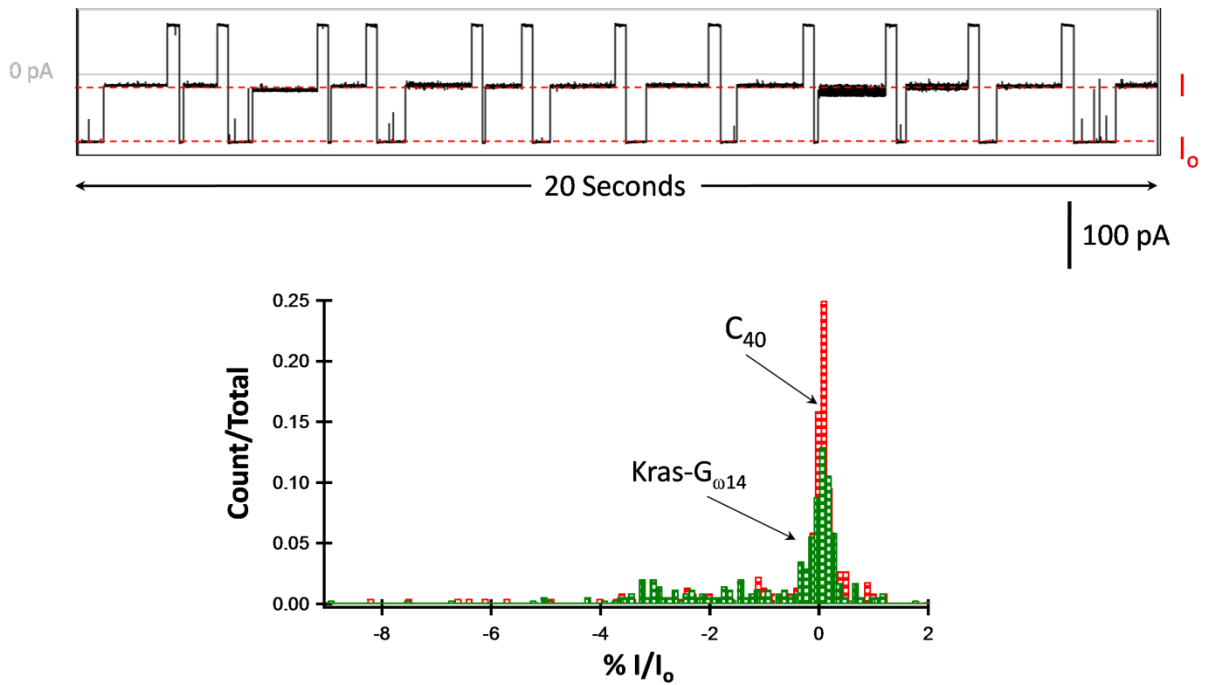

Figure SI 10. Example  $i-t$  traces for Strep-Btn Kras-OG<sub>014</sub> and the resulting % $I/I_0$  histogram compared with Strep-Btn Kras-G<sub>014</sub>.

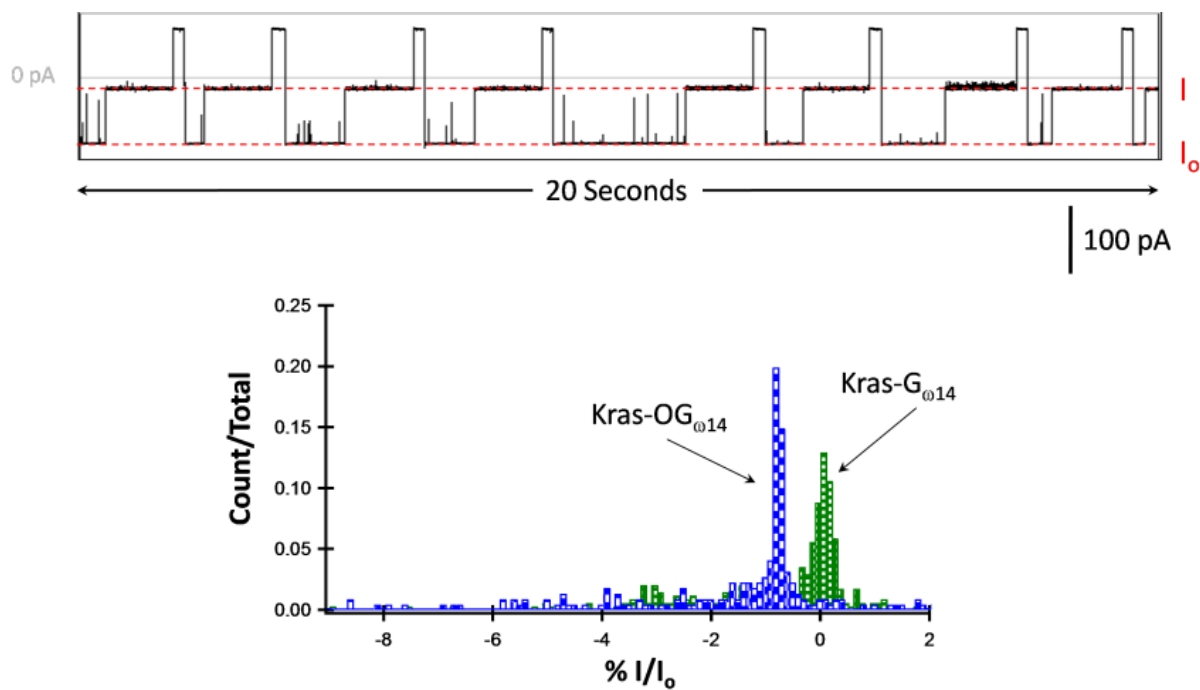



Figure SI 11. Example  $i$ - $t$  traces for Strep-Btn Kras-Sp<sub>014</sub> (upper) and Strep-Btn Kras-Gh<sub>014</sub> (lower), and the resulting  $\%I/I_0$  histograms compared with Strep-Btn Kras-G<sub>014</sub>.

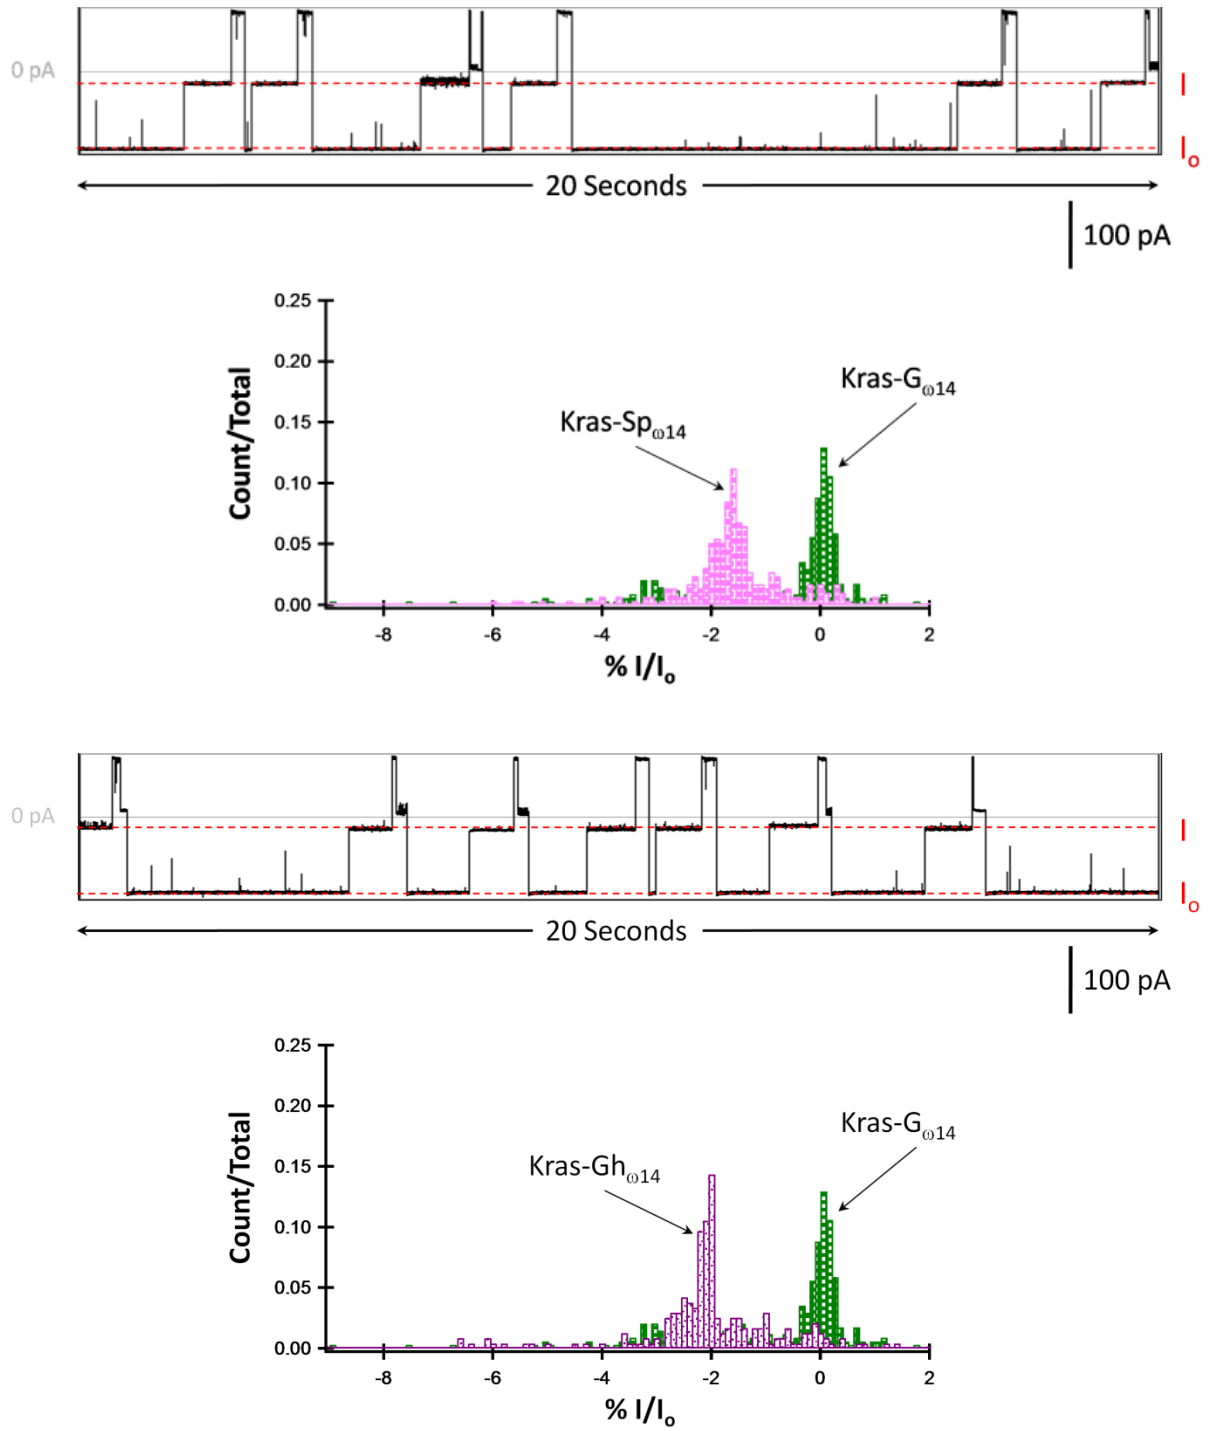

Figure SI 12. Example  $i-t$  trace for Strep-Btn Kras-Spm<sub>014</sub> and  $\%I/I_0$  histogram compared with Strep-Btn Kras-G<sub>014</sub>. Strep-Btn Kras-Spm<sub>014</sub> yields deeper current blockages relative to Strep-Btn Kras-G<sub>014</sub>, and a single  $\%I/I_0$  peak that is sharper relative to Strep-Btn C<sub>39</sub>Spm<sub>014</sub>.

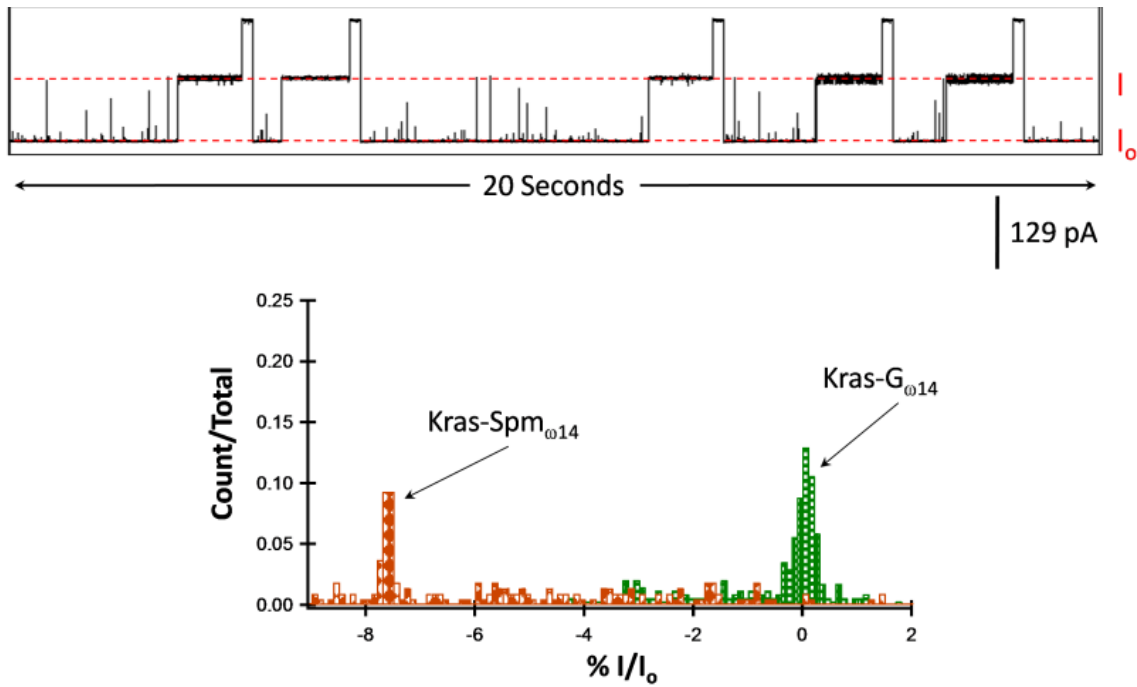

Figure SI 13. %I/I<sub>0</sub> histograms for native base substitutions at position ω14 within a poly-dC background, Strep-Btn C<sub>39</sub>X<sub>ω14</sub>, where X = A, T, or G. Strep-Btn C<sub>40</sub> is used as a reference sample; the %I/I<sub>0</sub> for Strep-Btn C<sub>40</sub> is set to 0 and %I/I<sub>0</sub> for all other samples is relative to Strep-Btn C<sub>40</sub>. Differences in the residual current for native base substitutions at position ω14 in a poly dC background have been previously reported.<sup>7</sup> The relative positions shown here are consistent, but possess smaller absolute residual current differences, this variation in contrast is attributed to differing experimental conditions.

C<sub>40</sub>-Btn 5'- CCCCCCCCCC CCCCCCCCCC CCCCCC X<sub>ω14</sub> CCC CCCCCCCCCC -Btn

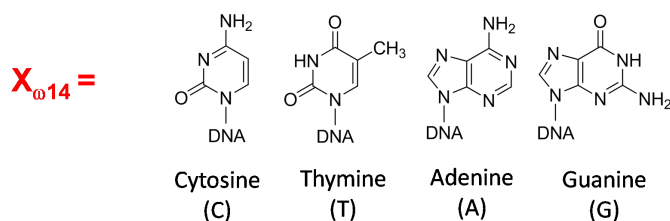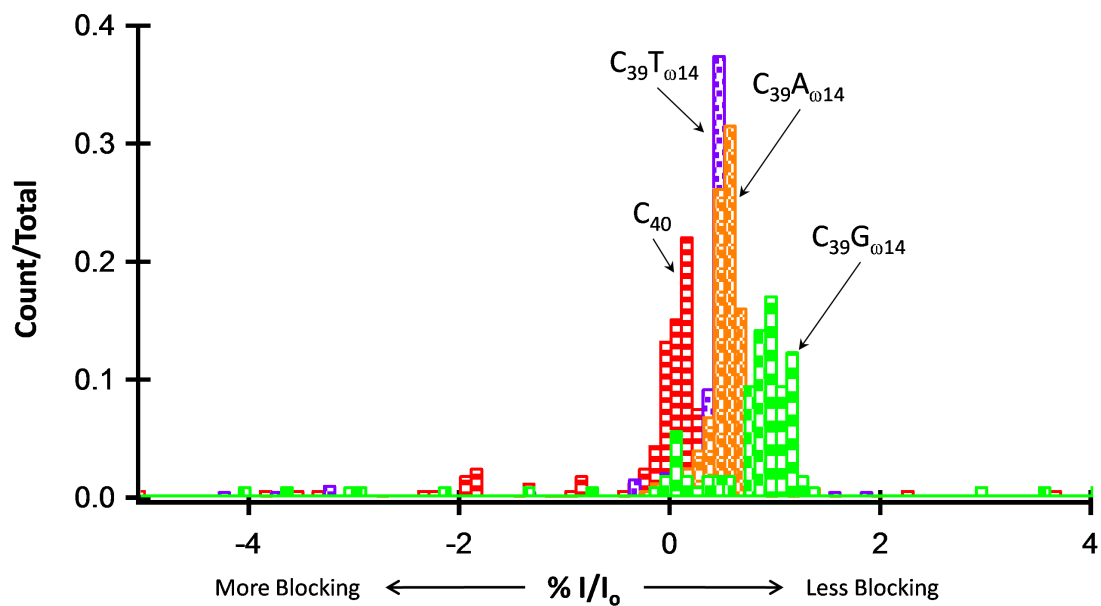

Figure SI 14. Current blockage histograms for Strep-Btn  $C_{39}X_{014}$ , where  $X = C, T, A, G, OG, Sp,$  and Gh. Strep-Btn  $C_{40}$  is used as a reference sample; the  $\%I/I_0$  for Strep-Btn  $C_{40}$  is set to 0 and  $\%I/I_0$  for all other samples is relative to Strep-Btn  $C_{40}$ .

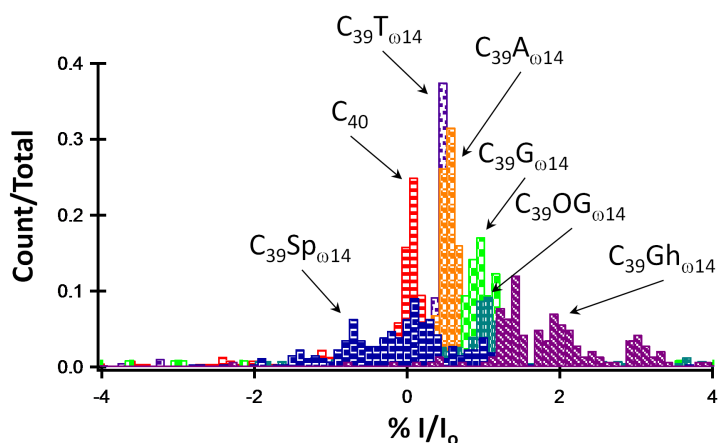

Figure SI 15. Current blockage histograms for Strep-Btn  $C_{39}X_{014}$ , where  $X = C, T, A, G, Lys, Bz,$  GlcN, Spd, Spm, and GPRP.  $C_{40}$  was used as a reference sample; the  $\%I/I_0$  for  $C_{40}$  was set equal to 0, and  $\%I/I_0$  for all other samples is relative to  $C_{40}$ .

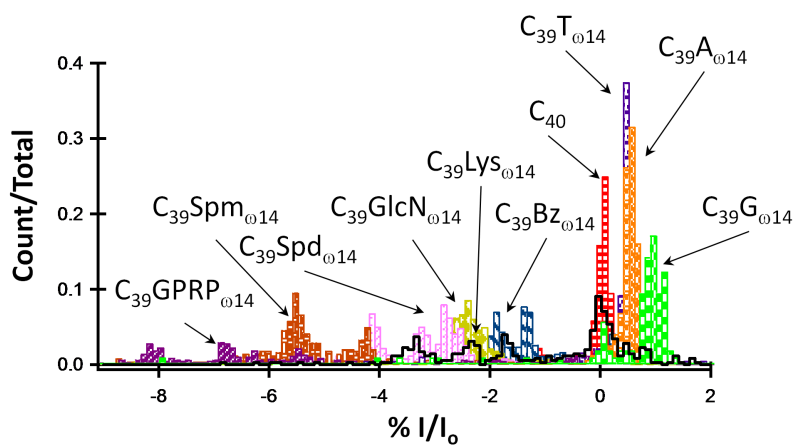

## References

---

- (1) Korniyushyna, O.; Berges, A. M.; Muller, J. G.; Burrows, C. J. In vitro nucleotide misinsertion opposite the oxidized guanosine lesions spiroiminodihydroantoin and guanidinohydroantoin and DNA synthesis past the lesions using *Escherichia coli* DNA polymerases I (Klenow Fragment). *Biochemistry* **2002**, *41*, 15304-15314.
- (2) Hosford, M. E.; Muller, J. G.; Burrows, C. J. Spermine participates in oxidative damage of guanosine and 8-oxoguanosine leading to deoxyribosylurea formation. *J. Am. Chem. Soc* **2004**, *126*, 9540-9541.
- (3) Xu, X.; Muller, J. G.; Ye, Y.; Burrows, C. J. DNA-protein cross-links between guanine and lysine depend on the mechanism of oxidation for formation of C5 vs C8 guanosine adducts. *J. Am. Chem. Soc* **2008**, *130*, 703-709.
- (4) Zhang, G.; Zhang, Y.; White, H. S. The nanopore electrode. *Anal. Chem.* **2004**, *76*, 6229-6238.
- (5) Zhang, B.; Galusha, J.; Shiozawa, P. G.; Wang, G.; Bergren, A. J.; Jones, R. J.; White, R. J.; Ervin, E. N.; Cauley, C. C.; White, H. S. Bench-top method for fabricating glass-sealed nanodisk electrodes, glass nanopore electrodes, and glass nanopore membranes of controlled size. *Anal Chem.* **2007**, *79*, 4778-4787.
- (6) White, R. J.; Ervin, E. N.; Yang, T.; Chen, X.; Daniel, S.; Cremer, P. S.; White, H. S. Single ion-channel recordings using glass nanopore membranes. *J. Am. Chem. Soc.* **2007**, *129*, 11766-00775.
- (7) Stoddart, D.; Heron, A. J.; Mikhailova, E.; Maglia, G.; Bayley, H. *Proc. Natl. Acad. Sci.* **2009**, *106*, 7702-7707.
